# Supplementary material
Source: publisher site journal article supplement (https://www.dovepress.com/article/310689)
Supplement: Supplementary file 1 [file get_supplementary_file.php]

The interview guide

(1) How has gout impacted your life? Please share your experience living with gout.

(2) What are the motivations to improve the management of your condition?

(3) What are the impediments for improving gout self-management?

(4) How do you cope with your condition during the gout remission stage?

(5) How do you cope with your condition during gout flares?

(6) What support do you need?

(7) What is the disease-related knowledge you need?

(8) Do you use mHealth APPs for gout self-management?

—If yes, what is the purpose of using such APPs? Please share your experience.

—If no, what are the reasons for not using such APPs?

(10) Do you want a mHealth APP to cope with your condition?

—If yes, what features and contents do you want to improve in the management of your condition?

—If no, what are the reasons for not wishing to have such an APP?
